# Supplementary material for: Transcriptome analysis of the 2,4-dichlorophenoxyacetic acid (2,4-D)-tolerant cotton chromosome substitution line CS-B15sh and its susceptible parental lines G. hirsutum L. cv. Texas Marker-1 and G. barbadense L. cv. Pima 379
Source: Front Plant Sci. 2022 Aug 22;13:910369. doi: 10.3389/fpls.2022.910369 (PMC9441920; doi:10.3389/fpls.2022.910369)
Supplement: Supplementary Table 3 — List of DEGs associated with photosynthesis. [file Table_3.XLSX]

## Sheet: PS_union
GeneID	Pima 379_log2FC	Pima 379_FDR	CS-B15sh_log2FC	CS-B15sh_FDR	TM-1_log2FC	TM-1_FDR	IPRID	Description	KEGGID	KEGGDescription	GOID	GOType	GODescription
Gohir.A01G080200	1.06817	0.046662	2.69462	3.26426e-05	3.29258	1.88521e-06	IPR000131|IPR035968	ATP synthase, F1 complex, gamma subunit|ATP synthase, F1 complex, gamma subunit superfamily	ko00190|ko00195|ko01522	Oxidative phosphorylation|Photosynthesis|Endocrine resistance	GO:0015986|GO:0045261|GO:0046933	Biological Process|Cellular Component|Molecular Function	ATP synthesis coupled proton transport|proton-transporting ATP synthase complex, catalytic core F(1)|proton-transporting ATP synthase activity, rotational mechanism
Gohir.A13G222600	1.80127	0.000241669	2.61782	1.78843e-06	1.49608	0.000229418	IPR001041|IPR010241|IPR012675|IPR036010	2Fe-2S ferredoxin-type iron-sulfur binding domain|Ferredoxin [2Fe-2S], plant|Beta-grasp domain superfamily|2Fe-2S ferredoxin-like superfamily	ko00195|ko01522	Photosynthesis|Endocrine resistance	GO:0009055|GO:0022900|GO:0051536|GO:0051537	Molecular Function|Biological Process|Molecular Function|Molecular Function	electron transfer activity|electron transport chain|iron-sulfur cluster binding|2 iron, 2 sulfur cluster binding
Gohir.D01G067400	1.04884	0.131932	1.5831	0.00872027	2.56497	0.000146207	IPR000131|IPR035968	ATP synthase, F1 complex, gamma subunit|ATP synthase, F1 complex, gamma subunit superfamily	ko00190|ko00195|ko01522	Oxidative phosphorylation|Photosynthesis|Endocrine resistance	GO:0015986|GO:0045261|GO:0046933	Biological Process|Cellular Component|Molecular Function	ATP synthesis coupled proton transport|proton-transporting ATP synthase complex, catalytic core F(1)|proton-transporting ATP synthase activity, rotational mechanism
Gohir.D13G227400	0.362604	0.259347	0.995997	0.00246297	1.081	0.000894956	IPR001041|IPR010241|IPR012675|IPR036010	2Fe-2S ferredoxin-type iron-sulfur binding domain|Ferredoxin [2Fe-2S], plant|Beta-grasp domain superfamily|2Fe-2S ferredoxin-like superfamily	ko00195|ko01522	Photosynthesis|Endocrine resistance	GO:0009055|GO:0022900|GO:0051536|GO:0051537	Molecular Function|Biological Process|Molecular Function|Molecular Function	electron transfer activity|electron transport chain|iron-sulfur cluster binding|2 iron, 2 sulfur cluster binding
Gohir.A05G110400	1.2834	0.000540581	0.993314	0.00139357	1.31397	6.63001e-05	IPR001433|IPR001709|IPR015701|IPR017927|IPR017938|IPR035442|IPR039261	Oxidoreductase FAD/NAD(P)-binding|Flavoprotein pyridine nucleotide cytochrome reductase|Ferredoxin--NADP reductase|FAD-binding domain, ferredoxin reductase-type|Riboflavin synthase-like beta-barrel|Ferredoxin--NADP reductase, plant and Cyanobacteria type|Ferredoxin-NADP reductase (FNR), nucleotide-binding domain	ko00195|ko01522	Photosynthesis|Endocrine resistance	GO:0016491|GO:0055114	Molecular Function|Biological Process	oxidoreductase activity|oxidation-reduction process
Gohir.D05G083700	0.799374	0.00394002	0.894855	0.000614543	1.38482	3.3797e-06	NA	NA	ko00195|ko01522	Photosynthesis|Endocrine resistance	NA	NA	NA
Gohir.D05G110800	0.601958	0.0101667	0.541245	0.0105765	0.786021	0.000426991	NA	NA	ko00195|ko01522	Photosynthesis|Endocrine resistance	NA	NA	NA
Gohir.A08G066200	-0.269291	0.367787	0.229357	0.39243	-1.18662	0.000178803	IPR003685|IPR036579	Photosystem I PsaD|Photosystem I, reaction centre subunit PsaD superfamily	ko00195|ko01522	Photosynthesis|Endocrine resistance	GO:0009522|GO:0009538|GO:0015979	Cellular Component|Cellular Component|Biological Process	photosystem I|photosystem I reaction center|photosynthesis
Gohir.A12G027700	0.234815	0.41687	-0.426086	0.103588	-0.993769	0.000540723	IPR001041|IPR010241|IPR012675|IPR036010	2Fe-2S ferredoxin-type iron-sulfur binding domain|Ferredoxin [2Fe-2S], plant|Beta-grasp domain superfamily|2Fe-2S ferredoxin-like superfamily	ko00195|ko01522	Photosynthesis|Endocrine resistance	GO:0009055|GO:0022900|GO:0051536|GO:0051537	Molecular Function|Biological Process|Molecular Function|Molecular Function	electron transfer activity|electron transport chain|iron-sulfur cluster binding|2 iron, 2 sulfur cluster binding
Gohir.D08G074900	-1.02744	0.0125515	-0.43479	0.219088	-1.85448	3.22752e-05	IPR003685|IPR036579	Photosystem I PsaD|Photosystem I, reaction centre subunit PsaD superfamily	ko00195|ko01522	Photosynthesis|Endocrine resistance	GO:0009522|GO:0009538|GO:0015979	Cellular Component|Cellular Component|Biological Process	photosystem I|photosystem I reaction center|photosynthesis
Gohir.D13G023200	-0.742583	0.0665118	-0.476926	0.193503	-1.46313	0.000403405	IPR001344|IPR022796|IPR023329	Chlorophyll A-B binding protein, plant|Chlorophyll A-B binding protein|Chlorophyll a/b binding domain superfamily	ko00196|ko01522	Photosynthesis - antenna proteins|Endocrine resistance	GO:0009765|GO:0016020	Biological Process|Cellular Component	photosynthesis, light harvesting|membrane
Gohir.D04G146200	-0.85301	0.00630449	-0.633029	0.020442	-1.08343	0.000266474	IPR017499	Protein Thf1	NA	NA	GO:0010207|GO:0015979	Biological Process|Biological Process	photosystem II assembly|photosynthesis
Gohir.A06G048000	-0.332534	0.117682	-0.64622	0.00228203	-0.861804	0.000114693	IPR002683|IPR007110|IPR016123	PsbP, C-terminal|Immunoglobulin-like domain|Mog1/PsbP, alpha/beta/alpha sandwich	NA	NA	GO:0005509|GO:0009523|GO:0009654|GO:0015979|GO:0019898	Molecular Function|Cellular Component|Cellular Component|Biological Process|Cellular Component	calcium ion binding|photosystem II|photosystem II oxygen evolving complex|photosynthesis|extrinsic component of membrane
Gohir.A13G024300	-0.611931	0.202459	-0.690927	0.116299	-1.68377	0.000599148	IPR001344|IPR022796|IPR023329	Chlorophyll A-B binding protein, plant|Chlorophyll A-B binding protein|Chlorophyll a/b binding domain superfamily	ko00196|ko01522	Photosynthesis - antenna proteins|Endocrine resistance	GO:0009765|GO:0016020	Biological Process|Cellular Component	photosynthesis, light harvesting|membrane
Gohir.D12G117600	-0.692827	0.0019528	-0.766222	0.000274828	-1.53723	5.0505e-08	NA	NA	ko00190|ko00195|ko01522	Oxidative phosphorylation|Photosynthesis|Endocrine resistance	NA	NA	NA
Gohir.D01G056300	-0.976739	0.0460331	-0.810066	0.0665093	-1.85643	0.000289629	IPR001344|IPR022796|IPR023329	Chlorophyll A-B binding protein, plant|Chlorophyll A-B binding protein|Chlorophyll a/b binding domain superfamily	ko00196|ko01522	Photosynthesis - antenna proteins|Endocrine resistance	GO:0009765|GO:0016020	Biological Process|Cellular Component	photosynthesis, light harvesting|membrane
Gohir.D01G217600	-0.800302	0.0272719	-0.857862	0.0112274	-2.1754	1.10563e-06	IPR001344|IPR022796|IPR023329	Chlorophyll A-B binding protein, plant|Chlorophyll A-B binding protein|Chlorophyll a/b binding domain superfamily	ko00196|ko01522	Photosynthesis - antenna proteins|Endocrine resistance	GO:0009765|GO:0016020	Biological Process|Cellular Component	photosynthesis, light harvesting|membrane
Gohir.D08G103700	-0.961458	0.00212553	-0.898442	0.00151018	-1.69372	1.16521e-06	IPR000454|IPR002379|IPR005953|IPR035921|IPR038662	ATP synthase, F0 complex, subunit C|V-ATPase proteolipid subunit C-like domain|ATP synthase, F0 complex, subunit C, bacterial/chloroplast|F/V-ATP synthase subunit C superfamily|F1F0 ATP synthase subunit C superfamily	ko00190|ko00195|ko01522	Oxidative phosphorylation|Photosynthesis|Endocrine resistance	GO:0015078|GO:0015986|GO:0033177|GO:0045263|GO:1902600	Molecular Function|Biological Process|Cellular Component|Cellular Component|Biological Process	proton transmembrane transporter activity|ATP synthesis coupled proton transport|proton-transporting two-sector ATPase complex, proton-transporting domain|proton-transporting ATP synthase complex, coupling factor F(o)|proton transmembrane transport
Gohir.A05G384500	-1.05747	0.00112796	-0.935227	0.00104181	-1.30194	2.54363e-05	IPR008796|IPR019379	Photosystem I reaction centre subunit N, chloroplastic|Gamma-secretase aspartyl protease complex, presenilin enhancer-2 subunit	ko00195|ko01522	Photosynthesis|Endocrine resistance	GO:0009522|GO:0015979	Cellular Component|Biological Process	photosystem I|photosynthesis
Gohir.A01G227800	-1.0229	0.0114527	-0.947465	0.00995754	-2.13859	3.73545e-06	IPR001344|IPR022796|IPR023329	Chlorophyll A-B binding protein, plant|Chlorophyll A-B binding protein|Chlorophyll a/b binding domain superfamily	ko00196|ko01522	Photosynthesis - antenna proteins|Endocrine resistance	GO:0009765|GO:0016020	Biological Process|Cellular Component	photosynthesis, light harvesting|membrane
Gohir.D06G145000	-0.944407	0.00390203	-1.00896	0.00100683	-1.1437	0.000222827	IPR009056|IPR036909	Cytochrome c-like domain|Cytochrome c-like domain superfamily	ko00195|ko01522	Photosynthesis|Endocrine resistance	GO:0009055|GO:0020037	Molecular Function|Molecular Function	electron transfer activity|heme binding
Gohir.D06G048000	-0.844357	0.00751829	-1.01622	0.00076501	-1.38053	2.36771e-05	IPR002683|IPR007110|IPR016123	PsbP, C-terminal|Immunoglobulin-like domain|Mog1/PsbP, alpha/beta/alpha sandwich	NA	NA	GO:0005509|GO:0009523|GO:0009654|GO:0015979|GO:0019898	Molecular Function|Cellular Component|Cellular Component|Biological Process|Cellular Component	calcium ion binding|photosystem II|photosystem II oxygen evolving complex|photosynthesis|extrinsic component of membrane
Gohir.A01G140039	-0.702042	0.010152	-1.01921	0.000234903	-1.46678	2.3224e-06	IPR000454|IPR002379|IPR005953|IPR035921|IPR038662	ATP synthase, F0 complex, subunit C|V-ATPase proteolipid subunit C-like domain|ATP synthase, F0 complex, subunit C, bacterial/chloroplast|F/V-ATP synthase subunit C superfamily|F1F0 ATP synthase subunit C superfamily	ko00190|ko00195|ko01522	Oxidative phosphorylation|Photosynthesis|Endocrine resistance	GO:0015078|GO:0015986|GO:0033177|GO:0045263|GO:1902600	Molecular Function|Biological Process|Cellular Component|Cellular Component|Biological Process	proton transmembrane transporter activity|ATP synthesis coupled proton transport|proton-transporting two-sector ATPase complex, proton-transporting domain|proton-transporting ATP synthase complex, coupling factor F(o)|proton transmembrane transport
Gohir.A02G134400	-1.13131	0.00124298	-1.02592	0.000891478	-0.935311	0.00142002	NA	NA	ko00195|ko01522	Photosynthesis|Endocrine resistance	NA	NA	NA
Gohir.D02G184350	-0.581517	0.0202459	-1.05585	9.0697e-05	-1.67025	2.22436e-07	NA	NA	ko00195|ko01522	Photosynthesis|Endocrine resistance	NA	NA	NA
Gohir.D07G171900	-1.58365	0.000550786	-1.06145	0.00364883	-2.44146	6.28726e-07	IPR001344|IPR022796|IPR023329	Chlorophyll A-B binding protein, plant|Chlorophyll A-B binding protein|Chlorophyll a/b binding domain superfamily	ko00196|ko01522	Photosynthesis - antenna proteins|Endocrine resistance	GO:0009765|GO:0016020	Biological Process|Cellular Component	photosynthesis, light harvesting|membrane
Gohir.A01G139684	-0.95373	0.0105054	-1.07054	0.00240779	-1.18961	0.000757089	IPR003687|IPR037270	Photosystem II PsbK|Photosystem II PsbK superfamily	ko00195|ko01522	Photosynthesis|Endocrine resistance	GO:0009523|GO:0009539|GO:0015979	Cellular Component|Cellular Component|Biological Process	photosystem II|photosystem II reaction center|photosynthesis
Gohir.A05G079200	-0.483806	0.281728	-1.0851	0.0117164	-1.9557	6.93381e-05	IPR017498	Photosystem I PsaO	ko00195|ko01522	Photosynthesis|Endocrine resistance	NA	NA	NA
Gohir.A07G179000	-1.0776	0.0324337	-1.09997	0.0173884	-2.47478	1.84883e-05	IPR001344|IPR022796|IPR023329	Chlorophyll A-B binding protein, plant|Chlorophyll A-B binding protein|Chlorophyll a/b binding domain superfamily	ko00196|ko01522	Photosynthesis - antenna proteins|Endocrine resistance	GO:0009765|GO:0016020	Biological Process|Cellular Component	photosynthesis, light harvesting|membrane
Gohir.A08G053600	-0.639935	0.00509921	-1.10317	1.36587e-05	-1.46411	1.83148e-07	IPR002683|IPR016123	PsbP, C-terminal|Mog1/PsbP, alpha/beta/alpha sandwich	NA	NA	GO:0005509|GO:0009523|GO:0009654|GO:0015979|GO:0019898	Molecular Function|Cellular Component|Cellular Component|Biological Process|Cellular Component	calcium ion binding|photosystem II|photosystem II oxygen evolving complex|photosynthesis|extrinsic component of membrane
Gohir.A12G124966	-0.708757	0.0388307	-1.12697	0.00113351	-1.38762	0.000111652	IPR003686|IPR037271	Photosystem II PsbI|Photosystem II PsbI superfamily	ko00195|ko01522	Photosynthesis|Endocrine resistance	GO:0009523|GO:0009539|GO:0015979|GO:0016020	Cellular Component|Cellular Component|Biological Process|Cellular Component	photosystem II|photosystem II reaction center|photosynthesis|membrane
Gohir.A05G300500	-0.960304	0.000215165	-1.1271	9.20435e-06	-1.59382	5.5689e-08	IPR002683|IPR016123	PsbP, C-terminal|Mog1/PsbP, alpha/beta/alpha sandwich	ko00195|ko01522	Photosynthesis|Endocrine resistance	GO:0005509|GO:0009523|GO:0009654|GO:0015979|GO:0019898	Molecular Function|Cellular Component|Cellular Component|Biological Process|Cellular Component	calcium ion binding|photosystem II|photosystem II oxygen evolving complex|photosynthesis|extrinsic component of membrane
Gohir.A11G101400	-1.80208	0.000220513	-1.14634	0.00266842	-1.52511	0.000151583	IPR002146	ATP synthase, F0 complex, subunit b/b', bacterial/chloroplast	ko00190|ko00195|ko01522	Oxidative phosphorylation|Photosynthesis|Endocrine resistance	GO:0015078|GO:0015986|GO:0045263	Molecular Function|Biological Process|Cellular Component	proton transmembrane transporter activity|ATP synthesis coupled proton transport|proton-transporting ATP synthase complex, coupling factor F(o)
Gohir.A11G146500	-1.10827	0.0421585	-1.15974	0.0220534	-2.53173	3.5393e-05	IPR001344|IPR022796|IPR023329	Chlorophyll A-B binding protein, plant|Chlorophyll A-B binding protein|Chlorophyll a/b binding domain superfamily	ko00196|ko01522	Photosynthesis - antenna proteins|Endocrine resistance	GO:0009765|GO:0016020	Biological Process|Cellular Component	photosynthesis, light harvesting|membrane
Gohir.D07G158900	-1.14011	0.000713838	-1.16118	0.000161485	-1.71466	1.13929e-06	IPR005610|IPR038676	Photosystem II Psb28, class 1|Photosystem II Psb28, class 1 superfamily	ko00195|ko01522	Photosynthesis|Endocrine resistance	GO:0009523|GO:0009654|GO:0015979|GO:0016020	Cellular Component|Cellular Component|Biological Process|Cellular Component	photosystem II|photosystem II oxygen evolving complex|photosynthesis|membrane
Gohir.A05G085900	-1.65933	0.000398416	-1.18758	0.00176101	-1.10392	0.00240021	IPR007826|IPR037269	Photosystem II PsbM|Photosystem II PsbM superfamily	ko00195|ko01522	Photosynthesis|Endocrine resistance	GO:0009523|GO:0015979|GO:0016021|GO:0019684	Cellular Component|Biological Process|Cellular Component|Biological Process	photosystem II|photosynthesis|integral component of membrane|photosynthesis, light reaction
Gohir.A10G168700	-0.544714	0.047749	-1.20674	7.85795e-05	-2.32229	2.53403e-08	IPR025585|IPR038450	Photosystem II Pbs27|Photosystem II Pbs27 superfamily	NA	NA	GO:0010207	Biological Process	photosystem II assembly
Gohir.A03G168400	-0.460076	0.0995919	-1.22397	8.81099e-05	-1.87391	3.34662e-07	IPR004207|IPR008990	Ferredoxin thioredoxin reductase, alpha chain|Electron transport accessory-like domain superfamily	NA	NA	GO:0015979	Biological Process	photosynthesis
Gohir.D08G063100	-0.925287	0.000346405	-1.23143	4.62252e-06	-1.5302	1.11203e-07	IPR002683|IPR016123	PsbP, C-terminal|Mog1/PsbP, alpha/beta/alpha sandwich	NA	NA	GO:0005509|GO:0009523|GO:0009654|GO:0015979|GO:0019898	Molecular Function|Cellular Component|Cellular Component|Biological Process|Cellular Component	calcium ion binding|photosystem II|photosystem II oxygen evolving complex|photosynthesis|extrinsic component of membrane
Gohir.A12G114100	-0.861764	0.000832023	-1.24358	6.14351e-06	-1.98747	1.13165e-08	IPR000711|IPR026015	ATPase, OSCP/delta subunit|F1F0 ATP synthase OSCP/delta subunit, N-terminal domain superfamily	ko00190|ko00195|ko01522	Oxidative phosphorylation|Photosynthesis|Endocrine resistance	GO:0015986|GO:0046933	Biological Process|Molecular Function	ATP synthesis coupled proton transport|proton-transporting ATP synthase activity, rotational mechanism
Gohir.A04G106100	-0.480846	0.0251633	-1.28151	2.8615e-06	-1.77282	2.11429e-08	IPR017499	Protein Thf1	NA	NA	GO:0010207|GO:0015979	Biological Process|Biological Process	photosystem II assembly|photosynthesis
Gohir.D11G152600	-0.810894	0.119288	-1.29901	0.00991484	-2.70657	1.2604e-05	IPR001344|IPR022796|IPR023329	Chlorophyll A-B binding protein, plant|Chlorophyll A-B binding protein|Chlorophyll a/b binding domain superfamily	ko00196|ko01522	Photosynthesis - antenna proteins|Endocrine resistance	GO:0009765|GO:0016020	Biological Process|Cellular Component	photosynthesis, light harvesting|membrane
Gohir.D10G114500	-0.565145	0.403451	-1.30233	0.0379874	-3.75181	8.54679e-06	NA	NA	ko00195|ko01522	Photosynthesis|Endocrine resistance	NA	NA	NA
Gohir.D13G132000	-0.903476	0.00601688	-1.30384	0.000111471	-2.45415	4.58116e-08	IPR000549|IPR016370|IPR017494|IPR023618	Photosystem I PsaG/PsaK protein|Photosystem I PsaG/PsaK, plant|Photosystem I PsaG, plant|Photosystem I PsaG/PsaK domain, chloroplastic	ko00195|ko01522	Photosynthesis|Endocrine resistance	GO:0009522|GO:0015979|GO:0016020	Cellular Component|Biological Process|Cellular Component	photosystem I|photosynthesis|membrane
Gohir.D05G170500	-0.645321	0.124383	-1.30839	0.00204743	-2.42877	2.98939e-06	NA	NA	ko00195|ko01522	Photosynthesis|Endocrine resistance	NA	NA	NA
Gohir.D07G171700	-1.1083	0.0098678	-1.33099	0.00125897	-2.63578	9.63813e-07	IPR001344|IPR022796|IPR023329	Chlorophyll A-B binding protein, plant|Chlorophyll A-B binding protein|Chlorophyll a/b binding domain superfamily	ko00196|ko01522	Photosynthesis - antenna proteins|Endocrine resistance	GO:0009765|GO:0016020	Biological Process|Cellular Component	photosynthesis, light harvesting|membrane
Gohir.D06G146300	-0.982858	0.00491194	-1.34491	0.000138058	-2.3497	1.34566e-07	IPR003666|IPR036577	Photosystem I PsaF, reaction centre subunit III|Photosystem I PsaF, reaction centre subunit III superfamily	ko00195|ko01522	Photosynthesis|Endocrine resistance	GO:0009522|GO:0009538|GO:0015979	Cellular Component|Cellular Component|Biological Process	photosystem I|photosystem I reaction center|photosynthesis
Gohir.D05G082100	-0.802366	0.0853554	-1.35175	0.00349137	-2.63801	4.07376e-06	NA	NA	ko00195|ko01522	Photosynthesis|Endocrine resistance	NA	NA	NA
Gohir.D02G038100	-1.11161	0.00140046	-1.37604	6.01667e-05	-2.23032	1.14945e-07	NA	NA	ko00195|ko01522	Photosynthesis|Endocrine resistance	NA	NA	NA
Gohir.A03G164600	-1.08858	0.00100631	-1.38067	3.02051e-05	-2.10327	1.01274e-07	IPR015943|IPR028203	WD40/YVTN repeat-like-containing domain superfamily|Photosynthesis system II assembly factor Ycf48/Hcf136-like domain	NA	NA	GO:0005515	Molecular Function	protein binding
Gohir.A13G128600	-0.749589	0.0239707	-1.38548	0.00011098	-2.49101	7.84017e-08	IPR000549|IPR016370|IPR017494|IPR023618	Photosystem I PsaG/PsaK protein|Photosystem I PsaG/PsaK, plant|Photosystem I PsaG, plant|Photosystem I PsaG/PsaK domain, chloroplastic	ko00195|ko01522	Photosynthesis|Endocrine resistance	GO:0009522|GO:0015979|GO:0016020	Cellular Component|Biological Process|Cellular Component	photosystem I|photosynthesis|membrane
Gohir.A07G202600	-0.936598	0.00569725	-1.39801	7.36831e-05	-2.25746	1.54989e-07	IPR003375|IPR008990	Photosystem I PsaE, reaction centre subunit IV|Electron transport accessory-like domain superfamily	ko00195|ko01522	Photosynthesis|Endocrine resistance	GO:0009522|GO:0009538|GO:0015979	Cellular Component|Cellular Component|Biological Process	photosystem I|photosystem I reaction center|photosynthesis
Gohir.A12G004600	-1.17746	0.00366019	-1.40126	0.000335878	-3.0219	4.65516e-08	IPR003685|IPR036579	Photosystem I PsaD|Photosystem I, reaction centre subunit PsaD superfamily	ko00195|ko01522	Photosynthesis|Endocrine resistance	GO:0009522|GO:0009538|GO:0015979	Cellular Component|Cellular Component|Biological Process	photosystem I|photosystem I reaction center|photosynthesis
Gohir.1Z049558	-1.18124	0.000958266	-1.4018	5.42591e-05	-2.33886	7.53492e-08	IPR003685|IPR036579	Photosystem I PsaD|Photosystem I, reaction centre subunit PsaD superfamily	ko00195|ko01522	Photosynthesis|Endocrine resistance	GO:0009522|GO:0009538|GO:0015979	Cellular Component|Cellular Component|Biological Process	photosystem I|photosystem I reaction center|photosynthesis
Gohir.A10G068160	-0.858243	0.00759052	-1.40433	5.08902e-05	-2.32759	8.10843e-08	IPR002683|IPR016123	PsbP, C-terminal|Mog1/PsbP, alpha/beta/alpha sandwich	NA	NA	GO:0005509|GO:0009523|GO:0009654|GO:0015979|GO:0019898	Molecular Function|Cellular Component|Cellular Component|Biological Process|Cellular Component	calcium ion binding|photosystem II|photosystem II oxygen evolving complex|photosynthesis|extrinsic component of membrane
Gohir.D05G300200	-1.32259	0.000205528	-1.41546	2.20249e-05	-1.94066	2.40201e-07	NA	NA	ko00195|ko01522	Photosynthesis|Endocrine resistance	NA	NA	NA
Gohir.D02G196000	-1.67613	0.00108116	-1.44167	0.00118163	-2.87176	8.21781e-07	NA	NA	ko00196|ko01522	Photosynthesis - antenna proteins|Endocrine resistance	NA	NA	NA
Gohir.A06G138900	-0.829345	0.00713369	-1.44231	2.31817e-05	-2.34372	3.86097e-08	IPR003666|IPR036577	Photosystem I PsaF, reaction centre subunit III|Photosystem I PsaF, reaction centre subunit III superfamily	ko00195|ko01522	Photosynthesis|Endocrine resistance	GO:0009522|GO:0009538|GO:0015979	Cellular Component|Cellular Component|Biological Process	photosystem I|photosystem I reaction center|photosynthesis
Gohir.A07G152700	-1.11693	0.00141022	-1.44306	4.02633e-05	-2.03874	3.5731e-07	IPR005610|IPR038676	Photosystem II Psb28, class 1|Photosystem II Psb28, class 1 superfamily	ko00195|ko01522	Photosynthesis|Endocrine resistance	GO:0009523|GO:0009654|GO:0015979|GO:0016020	Cellular Component|Cellular Component|Biological Process|Cellular Component	photosystem II|photosystem II oxygen evolving complex|photosynthesis|membrane
Gohir.A03G161000	-0.791113	0.00847166	-1.45736	1.71375e-05	-2.24065	4.93507e-08	IPR005805|IPR014349|IPR017941|IPR023960|IPR036922	Rieske iron-sulphur protein, C-terminal|Rieske iron-sulphur protein|Rieske [2Fe-2S] iron-sulphur domain|Cytochrome b6-f complex iron-sulfur subunit|Rieske [2Fe-2S] iron-sulphur domain superfamily	ko00195|ko01522	Photosynthesis|Endocrine resistance	GO:0016020|GO:0045158|GO:0051537|GO:0055114	Cellular Component|Molecular Function|Molecular Function|Biological Process	membrane|electron transporter, transferring electrons within cytochrome b6/f complex of photosystem II activity|2 iron, 2 sulfur cluster binding|oxidation-reduction process
Gohir.D09G218400	-0.900886	0.00942313	-1.4707	7.0684e-05	-2.08768	6.8208e-07	IPR001041|IPR010241|IPR012675|IPR036010	2Fe-2S ferredoxin-type iron-sulfur binding domain|Ferredoxin [2Fe-2S], plant|Beta-grasp domain superfamily|2Fe-2S ferredoxin-like superfamily	ko00195|ko01522	Photosynthesis|Endocrine resistance	GO:0009055|GO:0022900|GO:0051536|GO:0051537	Molecular Function|Biological Process|Molecular Function|Molecular Function	electron transfer activity|electron transport chain|iron-sulfur cluster binding|2 iron, 2 sulfur cluster binding
Gohir.A04G026100	-1.35086	0.0198324	-1.49053	0.00706837	-2.80136	3.51598e-05	IPR001344|IPR022796|IPR023329	Chlorophyll A-B binding protein, plant|Chlorophyll A-B binding protein|Chlorophyll a/b binding domain superfamily	ko00196|ko01522	Photosynthesis - antenna proteins|Endocrine resistance	GO:0009765|GO:0016020	Biological Process|Cellular Component	photosynthesis, light harvesting|membrane
Gohir.A12G209000	-0.894308	0.00394318	-1.49584	1.34208e-05	-2.04375	1.40122e-07	IPR001041|IPR012675|IPR036010	2Fe-2S ferredoxin-type iron-sulfur binding domain|Beta-grasp domain superfamily|2Fe-2S ferredoxin-like superfamily	ko00195|ko01522	Photosynthesis|Endocrine resistance	GO:0009055|GO:0051536	Molecular Function|Molecular Function	electron transfer activity|iron-sulfur cluster binding
Gohir.D03G068000	-0.827215	0.00152585	-1.51125	1.32846e-06	-2.17663	7.51252e-09	IPR001344|IPR022796|IPR023329	Chlorophyll A-B binding protein, plant|Chlorophyll A-B binding protein|Chlorophyll a/b binding domain superfamily	ko00196|ko01522	Photosynthesis - antenna proteins|Endocrine resistance	GO:0009765|GO:0016020	Biological Process|Cellular Component	photosynthesis, light harvesting|membrane
Gohir.A07G111250	-1.33843	0.0351019	-1.51373	0.0130602	-4.22113	5.05622e-05	IPR017498	Photosystem I PsaO	NA	NA	NA	NA	NA
Gohir.D07G082800	-0.672512	0.177507	-1.51971	0.0022132	-3.22443	1.19095e-06	IPR008797|IPR023222	Oxygen-evolving enhancer protein 3|PsbQ-like domain superfamily	NA	NA	GO:0005509|GO:0009523|GO:0009654|GO:0015979|GO:0019898	Molecular Function|Cellular Component|Cellular Component|Biological Process|Cellular Component	calcium ion binding|photosystem II|photosystem II oxygen evolving complex|photosynthesis|extrinsic component of membrane
Gohir.D02G184300	-0.803962	0.00981791	-1.54725	1.43118e-05	-2.24494	7.74365e-08	NA	NA	ko00195|ko01522	Photosynthesis|Endocrine resistance	NA	NA	NA
Gohir.D11G141200	-1.08076	0.00757465	-1.56845	0.000157234	-2.8038	1.46287e-07	IPR003375|IPR008990	Photosystem I PsaE, reaction centre subunit IV|Electron transport accessory-like domain superfamily	ko00195|ko01522	Photosynthesis|Endocrine resistance	GO:0009522|GO:0009538|GO:0015979	Cellular Component|Cellular Component|Biological Process	photosystem I|photosystem I reaction center|photosynthesis
Gohir.A13G176500	-0.957071	0.0102143	-1.56981	7.93194e-05	-2.23268	8.40452e-07	IPR002683|IPR016123	PsbP, C-terminal|Mog1/PsbP, alpha/beta/alpha sandwich	NA	NA	GO:0005509|GO:0009523|GO:0009654|GO:0015979|GO:0019898	Molecular Function|Cellular Component|Cellular Component|Biological Process|Cellular Component	calcium ion binding|photosystem II|photosystem II oxygen evolving complex|photosynthesis|extrinsic component of membrane
Gohir.D07G168100	-1.22818	0.00565934	-1.57758	0.000318158	-2.71744	5.22483e-07	IPR003757|IPR022980|IPR036592	Photosystem I PsaL, reaction centre subunit XI|Photosystem I, reaction centre subunit XI|Photosystem I PsaL, reaction centre subunit XI superfamily	ko00195|ko01522	Photosynthesis|Endocrine resistance	GO:0009522|GO:0009538|GO:0015979	Cellular Component|Cellular Component|Biological Process	photosystem I|photosystem I reaction center|photosynthesis
Gohir.D13G111900	-0.977705	0.002082	-1.58586	7.27259e-06	-2.31482	3.53005e-08	IPR002683|IPR016123	PsbP, C-terminal|Mog1/PsbP, alpha/beta/alpha sandwich	NA	NA	GO:0005509|GO:0009523|GO:0009654|GO:0015979|GO:0019898	Molecular Function|Cellular Component|Cellular Component|Biological Process|Cellular Component	calcium ion binding|photosystem II|photosystem II oxygen evolving complex|photosynthesis|extrinsic component of membrane
Gohir.D07G070400	-1.38158	0.0600373	-1.58614	0.0217396	-3.04478	0.000210781	IPR001344|IPR022796|IPR023329	Chlorophyll A-B binding protein, plant|Chlorophyll A-B binding protein|Chlorophyll a/b binding domain superfamily	ko00196|ko01522	Photosynthesis - antenna proteins|Endocrine resistance	GO:0009765|GO:0016020	Biological Process|Cellular Component	photosynthesis, light harvesting|membrane
Gohir.D02G238400	-1.38558	0.00317241	-1.59072	0.000392292	-2.96842	2.9715e-07	NA	NA	ko00195|ko01522	Photosynthesis|Endocrine resistance	NA	NA	NA
Gohir.D12G211700	-0.900542	0.00813664	-1.59952	2.42737e-05	-2.2336	2.29527e-07	NA	NA	ko00195|ko01522	Photosynthesis|Endocrine resistance	NA	NA	NA
Gohir.A07G078000	-0.91199	0.00563014	-1.60463	1.43001e-05	-2.39749	6.1791e-08	IPR008797|IPR023222	Oxygen-evolving enhancer protein 3|PsbQ-like domain superfamily	NA	NA	GO:0005509|GO:0009523|GO:0009654|GO:0015979|GO:0019898	Molecular Function|Cellular Component|Cellular Component|Biological Process|Cellular Component	calcium ion binding|photosystem II|photosystem II oxygen evolving complex|photosynthesis|extrinsic component of membrane
Gohir.A02G108200	-0.993186	0.000116321	-1.60712	1.83451e-07	-2.23667	1.91452e-09	NA	NA	ko00196|ko01522	Photosynthesis - antenna proteins|Endocrine resistance	NA	NA	NA
Gohir.D06G125800	-0.882806	0.0440223	-1.61722	0.000438093	-3.25179	1.5947e-07	IPR008797|IPR023222	Oxygen-evolving enhancer protein 3|PsbQ-like domain superfamily	ko00195|ko01522	Photosynthesis|Endocrine resistance	GO:0005509|GO:0009523|GO:0009654|GO:0015979|GO:0019898	Molecular Function|Cellular Component|Cellular Component|Biological Process|Cellular Component	calcium ion binding|photosystem II|photosystem II oxygen evolving complex|photosynthesis|extrinsic component of membrane
Gohir.D07G208800	-0.983695	0.0104672	-1.61829	7.93877e-05	-2.47695	3.40547e-07	IPR003375|IPR008990	Photosystem I PsaE, reaction centre subunit IV|Electron transport accessory-like domain superfamily	ko00195|ko01522	Photosynthesis|Endocrine resistance	GO:0009522|GO:0009538|GO:0015979	Cellular Component|Cellular Component|Biological Process	photosystem I|photosystem I reaction center|photosynthesis
Gohir.D11G194600	-1.33822	0.00352557	-1.62666	0.000268109	-2.77519	4.76925e-07	IPR002628|IPR011250	Photosystem II PsbO, manganese-stabilising|Outer membrane protein/outer membrane enzyme PagP, beta-barrel	ko00195|ko01522	Photosynthesis|Endocrine resistance	GO:0009654|GO:0010207|GO:0010242|GO:0042549	Cellular Component|Biological Process|Molecular Function|Biological Process	photosystem II oxygen evolving complex|photosystem II assembly|oxygen evolving activity|photosystem II stabilization
Gohir.D12G004300	-1.2355	0.00824593	-1.62687	0.000447748	-3.31345	1.42049e-07	NA	NA	ko00195|ko01522	Photosynthesis|Endocrine resistance	NA	NA	NA
Gohir.A06G121600	-0.91954	0.0452732	-1.62703	0.000636032	-3.27099	2.6354e-07	IPR008797|IPR023222	Oxygen-evolving enhancer protein 3|PsbQ-like domain superfamily	ko00195|ko01522	Photosynthesis|Endocrine resistance	GO:0005509|GO:0009523|GO:0009654|GO:0015979|GO:0019898	Molecular Function|Cellular Component|Cellular Component|Biological Process|Cellular Component	calcium ion binding|photosystem II|photosystem II oxygen evolving complex|photosynthesis|extrinsic component of membrane
Gohir.A06G148300	-1.01453	0.0055883	-1.6518	3.14127e-05	-2.52944	1.10097e-07	IPR000131|IPR035968	ATP synthase, F1 complex, gamma subunit|ATP synthase, F1 complex, gamma subunit superfamily	ko00190|ko00195|ko01522	Oxidative phosphorylation|Photosynthesis|Endocrine resistance	GO:0015986|GO:0045261|GO:0046933	Biological Process|Cellular Component|Molecular Function	ATP synthesis coupled proton transport|proton-transporting ATP synthase complex, catalytic core F(1)|proton-transporting ATP synthase activity, rotational mechanism
Gohir.D06G154200	-0.997706	0.00777973	-1.65936	4.31569e-05	-2.5679	1.44937e-07	IPR000131|IPR035968	ATP synthase, F1 complex, gamma subunit|ATP synthase, F1 complex, gamma subunit superfamily	ko00190|ko00195|ko01522	Oxidative phosphorylation|Photosynthesis|Endocrine resistance	GO:0015986|GO:0045261|GO:0046933	Biological Process|Cellular Component|Molecular Function	ATP synthesis coupled proton transport|proton-transporting ATP synthase complex, catalytic core F(1)|proton-transporting ATP synthase activity, rotational mechanism
Gohir.A07G065900	-1.12401	0.117895	-1.67196	0.016091	-2.90055	0.000442692	IPR001344|IPR022796|IPR023329	Chlorophyll A-B binding protein, plant|Chlorophyll A-B binding protein|Chlorophyll a/b binding domain superfamily	ko00196|ko01522	Photosynthesis - antenna proteins|Endocrine resistance	GO:0009765|GO:0016020	Biological Process|Cellular Component	photosynthesis, light harvesting|membrane
Gohir.A03G160900	-0.827144	0.0120414	-1.68904	1.15614e-05	-2.67911	2.60929e-08	IPR005805|IPR014349|IPR017941|IPR023960|IPR036922	Rieske iron-sulphur protein, C-terminal|Rieske iron-sulphur protein|Rieske [2Fe-2S] iron-sulphur domain|Cytochrome b6-f complex iron-sulfur subunit|Rieske [2Fe-2S] iron-sulphur domain superfamily	ko00195|ko01522	Photosynthesis|Endocrine resistance	GO:0016020|GO:0045158|GO:0051537|GO:0055114	Cellular Component|Molecular Function|Molecular Function|Biological Process	membrane|electron transporter, transferring electrons within cytochrome b6/f complex of photosystem II activity|2 iron, 2 sulfur cluster binding|oxidation-reduction process
Gohir.A09G216000	-1.19986	0.00148743	-1.69926	1.79169e-05	-2.66911	4.73248e-08	IPR001041|IPR010241|IPR012675|IPR036010	2Fe-2S ferredoxin-type iron-sulfur binding domain|Ferredoxin [2Fe-2S], plant|Beta-grasp domain superfamily|2Fe-2S ferredoxin-like superfamily	ko00195|ko01522	Photosynthesis|Endocrine resistance	GO:0009055|GO:0022900|GO:0051536|GO:0051537	Molecular Function|Biological Process|Molecular Function|Molecular Function	electron transfer activity|electron transport chain|iron-sulfur cluster binding|2 iron, 2 sulfur cluster binding
Gohir.D13G182950	-0.941834	0.0134138	-1.70974	5.00376e-05	-2.70691	1.68639e-07	IPR002683|IPR016123	PsbP, C-terminal|Mog1/PsbP, alpha/beta/alpha sandwich	NA	NA	GO:0005509|GO:0009523|GO:0009654|GO:0015979|GO:0019898	Molecular Function|Cellular Component|Cellular Component|Biological Process|Cellular Component	calcium ion binding|photosystem II|photosystem II oxygen evolving complex|photosynthesis|extrinsic component of membrane
Gohir.D11G276600	-1.01336	0.00342026	-1.71006	1.05033e-05	-3.15628	7.32462e-09	IPR002683|IPR016123	PsbP, C-terminal|Mog1/PsbP, alpha/beta/alpha sandwich	NA	NA	GO:0005509|GO:0009523|GO:0009654|GO:0015979|GO:0019898	Molecular Function|Cellular Component|Cellular Component|Biological Process|Cellular Component	calcium ion binding|photosystem II|photosystem II oxygen evolving complex|photosynthesis|extrinsic component of membrane
Gohir.A03G216800	-1.20061	0.00534534	-1.71124	0.000111112	-3.05929	1.00304e-07	IPR000549|IPR016370|IPR017493|IPR023618	Photosystem I PsaG/PsaK protein|Photosystem I PsaG/PsaK, plant|Photosystem I reaction centre subunit PsaK, chloroplastic|Photosystem I PsaG/PsaK domain, chloroplastic	ko00195|ko01522	Photosynthesis|Endocrine resistance	GO:0009522|GO:0015979|GO:0016020	Cellular Component|Biological Process|Cellular Component	photosystem I|photosynthesis|membrane
Gohir.D05G131200	-0.987901	0.0398915	-1.72434	0.000563549	-3.09619	8.04647e-07	NA	NA	ko00195|ko01522	Photosynthesis|Endocrine resistance	NA	NA	NA
Gohir.D05G330700	-0.852057	0.0329232	-1.72532	9.15153e-05	-2.89217	1.54444e-07	IPR006814	Photosystem II PsbR	ko00195|ko01522	Photosynthesis|Endocrine resistance	GO:0009523|GO:0009654|GO:0015979|GO:0042651	Cellular Component|Cellular Component|Biological Process|Cellular Component	photosystem II|photosystem II oxygen evolving complex|photosynthesis|thylakoid membrane
Gohir.A11G174700	-0.982613	0.00844067	-1.72721	2.90236e-05	-2.66716	9.40242e-08	IPR001433|IPR001709|IPR015701|IPR017927|IPR017938|IPR035442|IPR039261	Oxidoreductase FAD/NAD(P)-binding|Flavoprotein pyridine nucleotide cytochrome reductase|Ferredoxin--NADP reductase|FAD-binding domain, ferredoxin reductase-type|Riboflavin synthase-like beta-barrel|Ferredoxin--NADP reductase, plant and Cyanobacteria type|Ferredoxin-NADP reductase (FNR), nucleotide-binding domain	ko00195|ko01522	Photosynthesis|Endocrine resistance	GO:0016491|GO:0055114	Molecular Function|Biological Process	oxidoreductase activity|oxidation-reduction process
Gohir.D07G115000	-1.18099	0.0497794	-1.73086	0.00362253	-3.64741	2.60388e-06	IPR017498	Photosystem I PsaO	ko00195|ko01522	Photosynthesis|Endocrine resistance	NA	NA	NA
Gohir.A13G109100	2.31839	0.206465	-1.74282	1.14029e-05	-2.50469	1.01394e-07	IPR002683|IPR016123	PsbP, C-terminal|Mog1/PsbP, alpha/beta/alpha sandwich	NA	NA	GO:0005509|GO:0009523|GO:0009654|GO:0015979|GO:0019898	Molecular Function|Cellular Component|Cellular Component|Biological Process|Cellular Component	calcium ion binding|photosystem II|photosystem II oxygen evolving complex|photosynthesis|extrinsic component of membrane
Gohir.A03G067100	-1.32843	0.00688739	-1.76172	0.000326303	-3.27202	2.70761e-07	IPR002938|IPR010253|IPR011774|IPR011777|IPR036188	FAD-binding domain|Geranylgeranyl reductase, plant/prokaryotic|Geranylgeranyl reductase, plant/cyanobacteria|Geranylgeranyl reductase family|FAD/NAD(P)-binding domain superfamily	ko00860|ko00900	Porphyrin and chlorophyll metabolism|Terpenoid backbone biosynthesis	GO:0015979|GO:0015995|GO:0016628|GO:0045550|GO:0055114|GO:0071949	Biological Process|Biological Process|Molecular Function|Molecular Function|Biological Process|Molecular Function	photosynthesis|chlorophyll biosynthetic process|oxidoreductase activity, acting on the CH-CH group of donors, NAD or NADP as acceptor|geranylgeranyl reductase activity|oxidation-reduction process|FAD binding
Gohir.A07G160500	-1.39784	0.00260876	-1.76197	0.00012548	-3.21816	9.3341e-08	IPR003757|IPR022980|IPR036592	Photosystem I PsaL, reaction centre subunit XI|Photosystem I, reaction centre subunit XI|Photosystem I PsaL, reaction centre subunit XI superfamily	ko00195|ko01522	Photosynthesis|Endocrine resistance	GO:0009522|GO:0009538|GO:0015979	Cellular Component|Cellular Component|Biological Process	photosystem I|photosystem I reaction center|photosynthesis
Gohir.A07G015800	-1.15633	0.000407013	-1.76772	1.49184e-06	-2.52518	9.24706e-09	IPR001344|IPR022796|IPR023329	Chlorophyll A-B binding protein, plant|Chlorophyll A-B binding protein|Chlorophyll a/b binding domain superfamily	ko00196|ko01522	Photosynthesis - antenna proteins|Endocrine resistance	GO:0009765|GO:0016020	Biological Process|Cellular Component	photosynthesis, light harvesting|membrane
Gohir.1Z050180	-1.25938	0.015578	-1.77768	0.000919839	-1.38595	0.00421874	IPR006217|IPR013081|IPR013082|IPR037025	Photosystem II cytochrome b559, alpha subunit|Photosystem II cytochrome b559, N-terminal|Photosystem II cytochrome b559, alpha subunit, lumenal region|Photosystem II cytochrome b559, alpha subunit superfamily	ko00195|ko01522	Photosynthesis|Endocrine resistance	GO:0009523|GO:0009767|GO:0015979|GO:0016021|GO:0019684|GO:0020037|GO:0046872	Cellular Component|Biological Process|Biological Process|Cellular Component|Biological Process|Molecular Function|Molecular Function	photosystem II|photosynthetic electron transport chain|photosynthesis|integral component of membrane|photosynthesis, light reaction|heme binding|metal ion binding
Gohir.D01G180900	-1.24368	0.00102387	-1.78345	9.61617e-06	-2.4514	9.72046e-08	IPR002683|IPR016123	PsbP, C-terminal|Mog1/PsbP, alpha/beta/alpha sandwich	NA	NA	GO:0005509|GO:0009523|GO:0009654|GO:0015979|GO:0019898	Molecular Function|Cellular Component|Cellular Component|Biological Process|Cellular Component	calcium ion binding|photosystem II|photosystem II oxygen evolving complex|photosynthesis|extrinsic component of membrane
Gohir.D01G028200	-1.45973	0.000304348	-1.7867	9.56258e-06	-2.8224	2.31074e-08	IPR000711|IPR026015	ATPase, OSCP/delta subunit|F1F0 ATP synthase OSCP/delta subunit, N-terminal domain superfamily	ko00190|ko00195|ko01522	Oxidative phosphorylation|Photosynthesis|Endocrine resistance	GO:0015986|GO:0046933	Biological Process|Molecular Function	ATP synthesis coupled proton transport|proton-transporting ATP synthase activity, rotational mechanism
Gohir.A04G025800	-1.42057	0.0132822	-1.79722	0.000243178	-2.50583	7.59747e-06	IPR001344|IPR022796|IPR023329	Chlorophyll A-B binding protein, plant|Chlorophyll A-B binding protein|Chlorophyll a/b binding domain superfamily	ko00196|ko01522	Photosynthesis - antenna proteins|Endocrine resistance	GO:0009765|GO:0016020	Biological Process|Cellular Component	photosynthesis, light harvesting|membrane
Gohir.A01G188600	-1.29475	0.000601901	-1.79892	6.49593e-06	-2.25777	1.65106e-07	IPR002683|IPR016123	PsbP, C-terminal|Mog1/PsbP, alpha/beta/alpha sandwich	NA	NA	GO:0005509|GO:0009523|GO:0009654|GO:0015979|GO:0019898	Molecular Function|Cellular Component|Cellular Component|Biological Process|Cellular Component	calcium ion binding|photosystem II|photosystem II oxygen evolving complex|photosynthesis|extrinsic component of membrane
Gohir.A07G089500	-1.03799	0.0104162	-1.81023	4.53254e-05	-2.9364	1.35885e-07	IPR003757|IPR022980|IPR036592	Photosystem I PsaL, reaction centre subunit XI|Photosystem I, reaction centre subunit XI|Photosystem I PsaL, reaction centre subunit XI superfamily	ko00195|ko01522	Photosynthesis|Endocrine resistance	GO:0009522|GO:0009538|GO:0015979	Cellular Component|Cellular Component|Biological Process	photosystem I|photosystem I reaction center|photosynthesis
Gohir.A05G131700	-1.10846	0.0372447	-1.81281	0.000885413	-3.45692	8.46417e-07	IPR004928	Photosystem I PsaH, reaction centre subunit VI	ko00195|ko01522	Photosynthesis|Endocrine resistance	GO:0009522|GO:0009538|GO:0015979	Cellular Component|Cellular Component|Biological Process	photosystem I|photosystem I reaction center|photosynthesis
Gohir.A10G151800	-0.402148	0.607103	-1.81681	0.0127965	-4.09728	1.47785e-05	IPR002683|IPR016123	PsbP, C-terminal|Mog1/PsbP, alpha/beta/alpha sandwich	ko00195|ko01522	Photosynthesis|Endocrine resistance	GO:0005509|GO:0009523|GO:0009654|GO:0015979|GO:0019898	Molecular Function|Cellular Component|Cellular Component|Biological Process|Cellular Component	calcium ion binding|photosystem II|photosystem II oxygen evolving complex|photosynthesis|extrinsic component of membrane
Gohir.A08G046200	-1.03404	0.00271744	-1.82575	4.71235e-06	-3.01726	8.13276e-09	IPR003375|IPR008990	Photosystem I PsaE, reaction centre subunit IV|Electron transport accessory-like domain superfamily	ko00195|ko01522	Photosynthesis|Endocrine resistance	GO:0009522|GO:0009538|GO:0015979	Cellular Component|Cellular Component|Biological Process	photosystem I|photosystem I reaction center|photosynthesis
Gohir.A01G040600	-1.33091	0.000271168	-1.82751	2.6667e-06	-2.75625	1.01689e-08	IPR000711|IPR026015	ATPase, OSCP/delta subunit|F1F0 ATP synthase OSCP/delta subunit, N-terminal domain superfamily	ko00190|ko00195|ko01522	Oxidative phosphorylation|Photosynthesis|Endocrine resistance	GO:0015986|GO:0046933	Biological Process|Molecular Function	ATP synthesis coupled proton transport|proton-transporting ATP synthase activity, rotational mechanism
Gohir.A01G015900	-1.63338	0.00251608	-1.83234	0.000328149	-3.05871	9.70553e-07	IPR006311|IPR019546|IPR025585|IPR038450	Twin-arginine translocation pathway, signal sequence|Twin-arginine translocation pathway, signal sequence, bacterial/archaeal|Photosystem II Pbs27|Photosystem II Pbs27 superfamily	ko00195|ko01522	Photosynthesis|Endocrine resistance	GO:0010207	Biological Process	photosystem II assembly
Gohir.A11G266300	-1.19851	0.0013301	-1.83972	7.01155e-06	-3.5547	4.1352e-09	IPR002683|IPR016123	PsbP, C-terminal|Mog1/PsbP, alpha/beta/alpha sandwich	NA	NA	GO:0005509|GO:0009523|GO:0009654|GO:0015979|GO:0019898	Molecular Function|Cellular Component|Cellular Component|Biological Process|Cellular Component	calcium ion binding|photosystem II|photosystem II oxygen evolving complex|photosynthesis|extrinsic component of membrane
Gohir.A05G143600	-1.17746	0.00762325	-1.84659	7.83711e-05	-2.97311	2.12441e-07	IPR003666|IPR036577	Photosystem I PsaF, reaction centre subunit III|Photosystem I PsaF, reaction centre subunit III superfamily	ko00195|ko01522	Photosynthesis|Endocrine resistance	GO:0009522|GO:0009538|GO:0015979	Cellular Component|Cellular Component|Biological Process	photosystem I|photosystem I reaction center|photosynthesis
Gohir.A13G191900	-1.11977	0.0889812	-1.85963	0.00451228	-4.19728	2.16549e-06	IPR009518	Photosystem II PsbX	NA	NA	GO:0009523|GO:0015979|GO:0016020	Cellular Component|Biological Process|Cellular Component	photosystem II|photosynthesis|membrane
Gohir.A12G178300	-2.61319	0.000251409	-1.86285	0.00102645	-3.18786	4.68889e-06	IPR001344|IPR022796|IPR023329	Chlorophyll A-B binding protein, plant|Chlorophyll A-B binding protein|Chlorophyll a/b binding domain superfamily	ko00196|ko01522	Photosynthesis - antenna proteins|Endocrine resistance	GO:0009765|GO:0016020	Biological Process|Cellular Component	photosynthesis, light harvesting|membrane
Gohir.A04G001100	-1.82687	0.00412543	-1.87001	0.00144957	-3.42297	2.84992e-06	IPR000549|IPR016370|IPR017494|IPR023618	Photosystem I PsaG/PsaK protein|Photosystem I PsaG/PsaK, plant|Photosystem I PsaG, plant|Photosystem I PsaG/PsaK domain, chloroplastic	ko00195|ko01522	Photosynthesis|Endocrine resistance	GO:0009522|GO:0015979|GO:0016020	Cellular Component|Biological Process|Cellular Component	photosystem I|photosynthesis|membrane
Gohir.D08G056700	-0.923715	0.0130777	-1.87463	1.50982e-05	-3.16595	2.08844e-08	IPR003375|IPR008990	Photosystem I PsaE, reaction centre subunit IV|Electron transport accessory-like domain superfamily	ko00195|ko01522	Photosynthesis|Endocrine resistance	GO:0009522|GO:0009538|GO:0015979	Cellular Component|Cellular Component|Biological Process	photosystem I|photosystem I reaction center|photosynthesis
Gohir.D04G034900	-1.09477	0.0134784	-1.8795	8.5186e-05	-3.15372	1.51343e-07	IPR002683|IPR016123	PsbP, C-terminal|Mog1/PsbP, alpha/beta/alpha sandwich	ko00195|ko01522	Photosynthesis|Endocrine resistance	GO:0005509|GO:0009523|GO:0009654|GO:0015979|GO:0019898	Molecular Function|Cellular Component|Cellular Component|Biological Process|Cellular Component	calcium ion binding|photosystem II|photosystem II oxygen evolving complex|photosynthesis|extrinsic component of membrane
Gohir.D05G361900	-1.90043	0.00202031	-1.87962	0.000773389	-2.66474	2.21091e-05	NA	NA	ko00196|ko01522	Photosynthesis - antenna proteins|Endocrine resistance	NA	NA	NA
Gohir.A03G193000	-1.44509	0.00121445	-1.88462	3.12701e-05	-3.622	1.3939e-08	IPR001041|IPR010241|IPR012675|IPR036010	2Fe-2S ferredoxin-type iron-sulfur binding domain|Ferredoxin [2Fe-2S], plant|Beta-grasp domain superfamily|2Fe-2S ferredoxin-like superfamily	ko00195|ko01522	Photosynthesis|Endocrine resistance	GO:0009055|GO:0022900|GO:0051536|GO:0051537	Molecular Function|Biological Process|Molecular Function|Molecular Function	electron transfer activity|electron transport chain|iron-sulfur cluster binding|2 iron, 2 sulfur cluster binding
Gohir.D04G061800	-1.09413	0.00374541	-1.88504	1.00782e-05	-2.88519	3.52266e-08	IPR002683|IPR016123	PsbP, C-terminal|Mog1/PsbP, alpha/beta/alpha sandwich	NA	NA	GO:0005509|GO:0009523|GO:0009654|GO:0015979|GO:0019898	Molecular Function|Cellular Component|Cellular Component|Biological Process|Cellular Component	calcium ion binding|photosystem II|photosystem II oxygen evolving complex|photosynthesis|extrinsic component of membrane
Gohir.D12G180700	-1.96141	0.00107521	-1.88525	0.00046077	-3.34799	8.96913e-07	NA	NA	ko00196|ko01522	Photosynthesis - antenna proteins|Endocrine resistance	NA	NA	NA
Gohir.D11G182100	-1.0198	0.00998974	-1.8914	2.32881e-05	-2.98558	6.22465e-08	IPR001433|IPR001709|IPR015701|IPR017927|IPR017938|IPR035442|IPR039261	Oxidoreductase FAD/NAD(P)-binding|Flavoprotein pyridine nucleotide cytochrome reductase|Ferredoxin--NADP reductase|FAD-binding domain, ferredoxin reductase-type|Riboflavin synthase-like beta-barrel|Ferredoxin--NADP reductase, plant and Cyanobacteria type|Ferredoxin-NADP reductase (FNR), nucleotide-binding domain	ko00195|ko01522	Photosynthesis|Endocrine resistance	GO:0016491|GO:0055114	Molecular Function|Biological Process	oxidoreductase activity|oxidation-reduction process
Gohir.A03G172800	-2.34166	0.000158151	-1.89521	0.000230862	-2.69167	4.65235e-06	IPR001344|IPR022796|IPR023329	Chlorophyll A-B binding protein, plant|Chlorophyll A-B binding protein|Chlorophyll a/b binding domain superfamily	ko00196|ko01522	Photosynthesis - antenna proteins|Endocrine resistance	GO:0009765|GO:0016020	Biological Process|Cellular Component	photosynthesis, light harvesting|membrane
Gohir.D13G146400	-1.0636	0.00734223	-1.89556	2.09571e-05	-3.20336	3.01696e-08	IPR008797|IPR023222	Oxygen-evolving enhancer protein 3|PsbQ-like domain superfamily	ko00195|ko01522	Photosynthesis|Endocrine resistance	GO:0005509|GO:0009523|GO:0009654|GO:0015979|GO:0019898	Molecular Function|Cellular Component|Cellular Component|Biological Process|Cellular Component	calcium ion binding|photosystem II|photosystem II oxygen evolving complex|photosynthesis|extrinsic component of membrane
Gohir.A11G127700	-1.13306	0.0240547	-1.90453	0.000306634	-3.71933	1.70745e-07	IPR009806	Photosystem II PsbW, class 2	ko00195|ko01522	Photosynthesis|Endocrine resistance	GO:0009507|GO:0009523|GO:0015979	Cellular Component|Cellular Component|Biological Process	chloroplast|photosystem II|photosynthesis
Gohir.A11G135000	-1.39525	0.0029808	-1.90728	7.05601e-05	-3.2392	1.17085e-07	IPR003375|IPR008990	Photosystem I PsaE, reaction centre subunit IV|Electron transport accessory-like domain superfamily	ko00195|ko01522	Photosynthesis|Endocrine resistance	GO:0009522|GO:0009538|GO:0015979	Cellular Component|Cellular Component|Biological Process	photosystem I|photosystem I reaction center|photosynthesis
Gohir.D07G032851	-1.25803	0.00125115	-1.90751	7.27468e-06	-2.86362	2.92375e-08	IPR002146	ATP synthase, F0 complex, subunit b/b', bacterial/chloroplast	ko00190|ko00195|ko01522	Oxidative phosphorylation|Photosynthesis|Endocrine resistance	GO:0015078|GO:0015986|GO:0045263	Molecular Function|Biological Process|Cellular Component	proton transmembrane transporter activity|ATP synthesis coupled proton transport|proton-transporting ATP synthase complex, coupling factor F(o)
Gohir.A11G101333	-2.4737	0.000465659	-1.91114	0.00109042	-2.1749	0.000247213	IPR000194|IPR005294|IPR027417	ATPase, F1/V1/A1 complex, alpha/beta subunit, nucleotide-binding domain|ATP synthase, F1 complex, alpha subunit|P-loop containing nucleoside triphosphate hydrolase	ko00190|ko00195|ko01522	Oxidative phosphorylation|Photosynthesis|Endocrine resistance	GO:0005524|GO:0015986|GO:0045261|GO:0046933	Molecular Function|Biological Process|Cellular Component|Molecular Function	ATP binding|ATP synthesis coupled proton transport|proton-transporting ATP synthase complex, catalytic core F(1)|proton-transporting ATP synthase activity, rotational mechanism
Gohir.D07G094300	-0.59059	0.164964	-1.91164	7.90971e-05	-2.80399	9.19055e-07	IPR003757|IPR022980|IPR036592	Photosystem I PsaL, reaction centre subunit XI|Photosystem I, reaction centre subunit XI|Photosystem I PsaL, reaction centre subunit XI superfamily	ko00195|ko01522	Photosynthesis|Endocrine resistance	GO:0009522|GO:0009538|GO:0015979	Cellular Component|Cellular Component|Biological Process	photosystem I|photosystem I reaction center|photosynthesis
Gohir.A12G011400	-1.23208	0.00410665	-1.91463	3.29627e-05	-3.32003	3.85437e-08	IPR004207|IPR008990	Ferredoxin thioredoxin reductase, alpha chain|Electron transport accessory-like domain superfamily	NA	NA	GO:0015979	Biological Process	photosynthesis
Gohir.D02G214000	-1.24266	0.00640271	-1.9198	7.0059e-05	-3.59234	4.23111e-08	NA	NA	ko00195|ko01522	Photosynthesis|Endocrine resistance	NA	NA	NA
Gohir.A05G380700	-1.31213	0.00914048	-1.94277	0.000186609	-3.41497	2.56669e-07	IPR002683|IPR016123	PsbP, C-terminal|Mog1/PsbP, alpha/beta/alpha sandwich	ko00195|ko01522	Photosynthesis|Endocrine resistance	GO:0005509|GO:0009523|GO:0009654|GO:0015979|GO:0019898	Molecular Function|Cellular Component|Cellular Component|Biological Process|Cellular Component	calcium ion binding|photosystem II|photosystem II oxygen evolving complex|photosynthesis|extrinsic component of membrane
Gohir.A11G188100	-1.60329	0.00239909	-1.9503	0.000159904	-3.24542	3.81674e-07	IPR002628|IPR011250	Photosystem II PsbO, manganese-stabilising|Outer membrane protein/outer membrane enzyme PagP, beta-barrel	ko00195|ko01522	Photosynthesis|Endocrine resistance	GO:0009654|GO:0010207|GO:0010242|GO:0042549	Cellular Component|Biological Process|Molecular Function|Biological Process	photosystem II oxygen evolving complex|photosystem II assembly|oxygen evolving activity|photosystem II stabilization
Gohir.A07G028825	-1.19853	0.000982839	-1.96476	2.41164e-06	-2.63386	2.78419e-08	IPR002146	ATP synthase, F0 complex, subunit b/b', bacterial/chloroplast	ko00190|ko00195|ko01522	Oxidative phosphorylation|Photosynthesis|Endocrine resistance	GO:0015078|GO:0015986|GO:0045263	Molecular Function|Biological Process|Cellular Component	proton transmembrane transporter activity|ATP synthesis coupled proton transport|proton-transporting ATP synthase complex, coupling factor F(o)
Gohir.D05G145900	-1.11835	0.0247499	-1.97007	0.000213794	-3.34975	4.53346e-07	NA	NA	ko00195|ko01522	Photosynthesis|Endocrine resistance	NA	NA	NA
Gohir.A07G209400	-1.30922	0.0115424	-1.99348	0.000214143	-3.61921	2.30535e-07	IPR009806	Photosystem II PsbW, class 2	ko00195|ko01522	Photosynthesis|Endocrine resistance	GO:0009507|GO:0009523|GO:0015979	Cellular Component|Cellular Component|Biological Process	chloroplast|photosystem II|photosynthesis
Gohir.D08G206800	-1.07551	0.0472509	-2.00972	0.000459948	-4.03286	2.36797e-07	IPR009806	Photosystem II PsbW, class 2	ko00195|ko01522	Photosynthesis|Endocrine resistance	GO:0009507|GO:0009523|GO:0015979	Cellular Component|Cellular Component|Biological Process	chloroplast|photosystem II|photosynthesis
Gohir.A04G050200	-1.11104	0.0169668	-2.02595	7.43147e-05	-3.34692	1.63489e-07	IPR006814	Photosystem II PsbR	ko00195|ko01522	Photosynthesis|Endocrine resistance	GO:0009523|GO:0009654|GO:0015979|GO:0042651	Cellular Component|Cellular Component|Biological Process|Cellular Component	photosystem II|photosystem II oxygen evolving complex|photosynthesis|thylakoid membrane
Gohir.D05G185400	-1.29716	0.019715	-2.03559	0.000408912	-3.80289	4.08386e-07	NA	NA	ko00195|ko01522	Photosynthesis|Endocrine resistance	NA	NA	NA
Gohir.A08G188400	-1.27338	0.0252705	-2.03894	0.000531123	-4.1454	2.6966e-07	IPR009806	Photosystem II PsbW, class 2	ko00195|ko01522	Photosynthesis|Endocrine resistance	GO:0009507|GO:0009523|GO:0015979	Cellular Component|Cellular Component|Biological Process	chloroplast|photosystem II|photosynthesis
Gohir.D07G215500	-1.3576	0.0131466	-2.04196	0.000300468	-3.73232	3.46043e-07	IPR009806	Photosystem II PsbW, class 2	ko00195|ko01522	Photosynthesis|Endocrine resistance	GO:0009507|GO:0009523|GO:0015979	Cellular Component|Cellular Component|Biological Process	chloroplast|photosystem II|photosynthesis
Gohir.D12G141300	-1.22357	0.0142366	-2.05363	0.000131632	-4.29745	4.94291e-08	NA	NA	ko00195|ko01522	Photosynthesis|Endocrine resistance	NA	NA	NA
Gohir.D09G110500	-1.32834	0.00437108	-2.05717	3.77093e-05	-3.38259	8.18937e-08	IPR040296	Photosystem II 5kDa protein, chloroplastic	NA	NA	NA	NA	NA
Gohir.D03G093600	-1.29616	0.024133	-2.06124	0.000526961	-4.06341	3.48005e-07	IPR002938|IPR010253|IPR011774|IPR011777|IPR036188	FAD-binding domain|Geranylgeranyl reductase, plant/prokaryotic|Geranylgeranyl reductase, plant/cyanobacteria|Geranylgeranyl reductase family|FAD/NAD(P)-binding domain superfamily	ko00860|ko00900	Porphyrin and chlorophyll metabolism|Terpenoid backbone biosynthesis	GO:0015979|GO:0015995|GO:0016628|GO:0045550|GO:0055114|GO:0071949	Biological Process|Biological Process|Molecular Function|Molecular Function|Biological Process|Molecular Function	photosynthesis|chlorophyll biosynthetic process|oxidoreductase activity, acting on the CH-CH group of donors, NAD or NADP as acceptor|geranylgeranyl reductase activity|oxidation-reduction process|FAD binding
Gohir.A13G141700	-1.4897	0.00513777	-2.08474	0.000131441	-3.66613	1.89328e-07	IPR008797|IPR023222	Oxygen-evolving enhancer protein 3|PsbQ-like domain superfamily	ko00195|ko01522	Photosynthesis|Endocrine resistance	GO:0005509|GO:0009523|GO:0009654|GO:0015979|GO:0019898	Molecular Function|Cellular Component|Cellular Component|Biological Process|Cellular Component	calcium ion binding|photosystem II|photosystem II oxygen evolving complex|photosynthesis|extrinsic component of membrane
Gohir.A12G148801	-1.4715	0.0152348	-2.09794	0.00062706	-3.06918	1.06736e-05	IPR001344|IPR022796|IPR023329	Chlorophyll A-B binding protein, plant|Chlorophyll A-B binding protein|Chlorophyll a/b binding domain superfamily	ko00196|ko01522	Photosynthesis - antenna proteins|Endocrine resistance	GO:0009765|GO:0016020	Biological Process|Cellular Component	photosynthesis, light harvesting|membrane
Gohir.D08G164800	-1.34721	0.0102949	-2.10359	0.000141016	-4.00246	9.26359e-08	IPR040296	Photosystem II 5kDa protein, chloroplastic	NA	NA	NA	NA	NA
Gohir.D12G152700	-1.18167	0.071589	-2.12035	0.00164788	-3.61697	8.77708e-06	NA	NA	ko00196|ko01522	Photosynthesis - antenna proteins|Endocrine resistance	NA	NA	NA
Gohir.A01G162700	-1.71026	0.002102	-2.13699	0.000106056	-3.56281	2.51602e-07	IPR001344|IPR022796|IPR023329	Chlorophyll A-B binding protein, plant|Chlorophyll A-B binding protein|Chlorophyll a/b binding domain superfamily	ko00196|ko01522	Photosynthesis - antenna proteins|Endocrine resistance	GO:0009765|GO:0016020	Biological Process|Cellular Component	photosynthesis, light harvesting|membrane
Gohir.A08G143800	-1.45777	0.00777198	-2.14072	0.000160991	-4.1002	1.02816e-07	IPR040296	Photosystem II 5kDa protein, chloroplastic	NA	NA	NA	NA	NA
Gohir.D05G237400	-2.49019	0.00110803	-2.14159	0.00106551	-4.96496	2.41527e-07	NA	NA	ko00195|ko01522	Photosynthesis|Endocrine resistance	NA	NA	NA
Gohir.A09G113900	-1.52582	0.00168404	-2.15379	2.40935e-05	-3.32321	9.36341e-08	IPR040296	Photosystem II 5kDa protein, chloroplastic	NA	NA	NA	NA	NA
Gohir.D01G015900	-2.03721	0.000827867	-2.16296	0.000130965	-3.48051	5.43222e-07	IPR006311|IPR019546|IPR025585|IPR038450	Twin-arginine translocation pathway, signal sequence|Twin-arginine translocation pathway, signal sequence, bacterial/archaeal|Photosystem II Pbs27|Photosystem II Pbs27 superfamily	ko00195|ko01522	Photosynthesis|Endocrine resistance	GO:0010207	Biological Process	photosystem II assembly
Gohir.D01G147300	-1.58388	0.00611745	-2.19572	0.000193054	-3.81625	3.61726e-07	IPR001344|IPR022796|IPR023329	Chlorophyll A-B binding protein, plant|Chlorophyll A-B binding protein|Chlorophyll a/b binding domain superfamily	ko00196|ko01522	Photosynthesis - antenna proteins|Endocrine resistance	GO:0009765|GO:0016020	Biological Process|Cellular Component	photosynthesis, light harvesting|membrane
Gohir.A10G016700	-1.29016	0.0296359	-2.20686	0.000415449	-4.16123	4.35237e-07	IPR008797|IPR023222	Oxygen-evolving enhancer protein 3|PsbQ-like domain superfamily	ko00195|ko01522	Photosynthesis|Endocrine resistance	GO:0005509|GO:0009523|GO:0009654|GO:0015979|GO:0019898	Molecular Function|Cellular Component|Cellular Component|Biological Process|Cellular Component	calcium ion binding|photosystem II|photosystem II oxygen evolving complex|photosynthesis|extrinsic component of membrane
Gohir.A11G226800	-1.80737	0.00290373	-2.21096	0.000204373	-3.79708	4.48094e-07	IPR008796	Photosystem I reaction centre subunit N, chloroplastic	ko00195|ko01522	Photosynthesis|Endocrine resistance	GO:0009522|GO:0015979	Cellular Component|Biological Process	photosystem I|photosynthesis
Gohir.A13G077100	-1.47428	0.00643004	-2.21892	9.58282e-05	-3.82737	1.64101e-07	IPR008797|IPR023222	Oxygen-evolving enhancer protein 3|PsbQ-like domain superfamily	ko00195|ko01522	Photosynthesis|Endocrine resistance	GO:0005509|GO:0009523|GO:0009654|GO:0015979|GO:0019898	Molecular Function|Cellular Component|Cellular Component|Biological Process|Cellular Component	calcium ion binding|photosystem II|photosystem II oxygen evolving complex|photosynthesis|extrinsic component of membrane
Gohir.A05G182400	-1.57055	0.00627517	-2.21913	0.000168441	-3.92535	2.51191e-07	IPR000923|IPR001235|IPR002387|IPR008972	Blue (type 1) copper domain|Blue (type 1) copper protein, plastocyanin-type|Plastocyanin|Cupredoxin	ko00195|ko01522	Photosynthesis|Endocrine resistance	GO:0005507|GO:0009055	Molecular Function|Molecular Function	copper ion binding|electron transfer activity
Gohir.D11G230800	-1.5318	0.0122482	-2.22053	0.000382591	-4.01372	6.1019e-07	IPR008796	Photosystem I reaction centre subunit N, chloroplastic	ko00195|ko01522	Photosynthesis|Endocrine resistance	GO:0009522|GO:0015979	Cellular Component|Biological Process	photosystem I|photosynthesis
Gohir.D11G133100	-0.955647	0.0566124	-2.23086	9.63066e-05	-3.97687	1.39275e-07	IPR009806	Photosystem II PsbW, class 2	NA	NA	GO:0009507|GO:0009523|GO:0015979	Cellular Component|Cellular Component|Biological Process	chloroplast|photosystem II|photosynthesis
Gohir.D13G197300	-1.55816	0.016021	-2.2318	0.000667087	-4.14709	1.01489e-06	IPR009518	Photosystem II PsbX	NA	NA	GO:0009523|GO:0015979|GO:0016020	Cellular Component|Biological Process|Cellular Component	photosystem II|photosynthesis|membrane
Gohir.A05G350800	-1.52139	0.00316438	-2.25714	3.66383e-05	-3.7185	8.44827e-08	IPR002683|IPR016123	PsbP, C-terminal|Mog1/PsbP, alpha/beta/alpha sandwich	NA	NA	GO:0005509|GO:0009523|GO:0009654|GO:0015979|GO:0019898	Molecular Function|Cellular Component|Cellular Component|Biological Process|Cellular Component	calcium ion binding|photosystem II|photosystem II oxygen evolving complex|photosynthesis|extrinsic component of membrane
Gohir.A12G137300	-1.40129	0.00962703	-2.28416	8.78626e-05	-4.37387	6.32576e-08	IPR006311|IPR025585|IPR038450	Twin-arginine translocation pathway, signal sequence|Photosystem II Pbs27|Photosystem II Pbs27 superfamily	ko00195|ko01522	Photosynthesis|Endocrine resistance	GO:0010207	Biological Process	photosystem II assembly
Gohir.D13G076600	-1.57405	0.00264495	-2.28729	3.50106e-05	-3.92087	5.52466e-08	IPR008797|IPR023222	Oxygen-evolving enhancer protein 3|PsbQ-like domain superfamily	ko00195|ko01522	Photosynthesis|Endocrine resistance	GO:0005509|GO:0009523|GO:0009654|GO:0015979|GO:0019898	Molecular Function|Cellular Component|Cellular Component|Biological Process|Cellular Component	calcium ion binding|photosystem II|photosystem II oxygen evolving complex|photosynthesis|extrinsic component of membrane
Gohir.D10G247500	-1.26589	0.0302201	-2.2992	0.00025521	-3.32	3.79878e-06	NA	NA	ko00196|ko01522	Photosynthesis - antenna proteins|Endocrine resistance	NA	NA	NA
Gohir.D01G180400	-1.46585	0.00106921	-2.3249	4.0606e-06	-3.13219	5.0505e-08	IPR022796|IPR023329	Chlorophyll A-B binding protein|Chlorophyll a/b binding domain superfamily	ko00195|ko01522	Photosynthesis|Endocrine resistance	NA	NA	NA
Gohir.A13G191800	-1.37641	0.0203305	-2.33604	0.000224	-4.41503	2.24433e-07	IPR009518	Photosystem II PsbX	NA	NA	GO:0009523|GO:0015979|GO:0016020	Cellular Component|Biological Process|Cellular Component	photosystem II|photosynthesis|membrane
Gohir.D12G059600	-1.33122	0.0137898	-2.35514	7.43087e-05	-4.18214	9.69599e-08	NA	NA	ko00195|ko01522	Photosynthesis|Endocrine resistance	NA	NA	NA
Gohir.D07G015500	-1.09229	0.00732263	-2.38463	3.08838e-06	-3.74387	1.03885e-08	IPR001344|IPR022796|IPR023329	Chlorophyll A-B binding protein, plant|Chlorophyll A-B binding protein|Chlorophyll a/b binding domain superfamily	ko00196|ko01522	Photosynthesis - antenna proteins|Endocrine resistance	GO:0009765|GO:0016020	Biological Process|Cellular Component	photosynthesis, light harvesting|membrane
Gohir.D01G153400	-1.7205	0.00312141	-2.46533	5.29287e-05	-4.48582	5.53301e-08	IPR009388|IPR038760	Photosystem II PsbY|Photosystem II PsbY, plant	ko00195|ko01522	Photosynthesis|Endocrine resistance	GO:0009523|GO:0015979|GO:0016021|GO:0030145	Cellular Component|Biological Process|Cellular Component|Molecular Function	photosystem II|photosynthesis|integral component of membrane|manganese ion binding
Gohir.A01G156900	-1.76658	0.00210588	-2.46789	3.83663e-05	-4.45676	4.15567e-08	IPR009388|IPR038760	Photosystem II PsbY|Photosystem II PsbY, plant	ko00195|ko01522	Photosynthesis|Endocrine resistance	GO:0009523|GO:0015979|GO:0016021|GO:0030145	Cellular Component|Biological Process|Cellular Component|Molecular Function	photosystem II|photosynthesis|integral component of membrane|manganese ion binding
Gohir.A05G235100	-1.97663	0.00415508	-2.50963	0.000242828	-4.78418	2.62057e-07	IPR022796|IPR023329	Chlorophyll A-B binding protein|Chlorophyll a/b binding domain superfamily	ko00195|ko01522	Photosynthesis|Endocrine resistance	NA	NA	NA
Gohir.A07G014066	-1.74578	0.00153204	-2.55118	1.59636e-05	-4.01797	5.61918e-08	IPR009518	Photosystem II PsbX	NA	NA	GO:0009523|GO:0015979|GO:0016020	Cellular Component|Biological Process|Cellular Component	photosystem II|photosynthesis|membrane
Gohir.D05G189000	-1.62989	0.00324085	-2.55842	2.36967e-05	-3.68676	2.14237e-07	NA	NA	ko00195|ko01522	Photosynthesis|Endocrine resistance	NA	NA	NA
Gohir.D01G107900	-1.70816	0.0091863	-2.59216	0.000172724	-4.72504	2.73852e-07	IPR001344|IPR022796|IPR023329	Chlorophyll A-B binding protein, plant|Chlorophyll A-B binding protein|Chlorophyll a/b binding domain superfamily	ko00196|ko01522	Photosynthesis - antenna proteins|Endocrine resistance	GO:0009765|GO:0016020	Biological Process|Cellular Component	photosynthesis, light harvesting|membrane
Gohir.D13G034500	-1.28985	0.00985933	-2.59589	1.21792e-05	-4.47103	2.02494e-08	IPR001041|IPR010241|IPR012675|IPR036010	2Fe-2S ferredoxin-type iron-sulfur binding domain|Ferredoxin [2Fe-2S], plant|Beta-grasp domain superfamily|2Fe-2S ferredoxin-like superfamily	ko00195|ko01522	Photosynthesis|Endocrine resistance	GO:0009055|GO:0022900|GO:0051536|GO:0051537	Molecular Function|Biological Process|Molecular Function|Molecular Function	electron transfer activity|electron transport chain|iron-sulfur cluster binding|2 iron, 2 sulfur cluster binding
Gohir.A01G119400	-1.66652	0.00304262	-2.62816	2.11897e-05	-4.13559	8.91386e-08	IPR001344|IPR022796|IPR023329	Chlorophyll A-B binding protein, plant|Chlorophyll A-B binding protein|Chlorophyll a/b binding domain superfamily	ko00196|ko01522	Photosynthesis - antenna proteins|Endocrine resistance	GO:0009765|GO:0016020	Biological Process|Cellular Component	photosynthesis, light harvesting|membrane
Gohir.D01G177500	-2.50405	9.94588e-05	-2.63505	1.18188e-05	-3.83739	8.85374e-08	IPR003251|IPR008434|IPR009078	Rubrerythrin|Magnesium-protoporphyrin IX monomethyl ester [oxidative] cyclase|Ferritin-like superfamily	ko00860	Porphyrin and chlorophyll metabolism	GO:0015979|GO:0015995|GO:0016491|GO:0046872|GO:0048529|GO:0055114	Biological Process|Biological Process|Molecular Function|Molecular Function|Molecular Function|Biological Process	photosynthesis|chlorophyll biosynthetic process|oxidoreductase activity|metal ion binding|magnesium-protoporphyrin IX monomethyl ester (oxidative) cyclase activity|oxidation-reduction process
Gohir.A05G032800	-1.74936	0.0146588	-2.64029	0.000391022	-5.36996	2.62558e-07	IPR009518	Photosystem II PsbX	NA	NA	GO:0009523|GO:0015979|GO:0016020	Cellular Component|Biological Process|Cellular Component	photosystem II|photosynthesis|membrane
Gohir.A07G190800	-1.80803	0.00260703	-2.65289	3.02902e-05	-5.0518	3.50362e-08	IPR001344|IPR022796|IPR023329	Chlorophyll A-B binding protein, plant|Chlorophyll A-B binding protein|Chlorophyll a/b binding domain superfamily	ko00196|ko01522	Photosynthesis - antenna proteins|Endocrine resistance	GO:0009765|GO:0016020	Biological Process|Cellular Component	photosynthesis, light harvesting|membrane
Gohir.D07G013766	-1.88304	0.00170695	-2.65397	2.68581e-05	-4.47177	5.68426e-08	IPR009518	Photosystem II PsbX	NA	NA	GO:0009523|GO:0015979|GO:0016020	Cellular Component|Biological Process|Cellular Component	photosystem II|photosynthesis|membrane
Gohir.D10G016800	-1.64573	0.0160408	-2.6678	0.00024157	-4.84912	4.04547e-07	NA	NA	ko00195|ko01522	Photosynthesis|Endocrine resistance	NA	NA	NA
Gohir.A01G189100	-1.88509	0.00106032	-2.70685	1.14649e-05	-4.13741	5.49465e-08	IPR022796|IPR023329	Chlorophyll A-B binding protein|Chlorophyll a/b binding domain superfamily	ko00195|ko01522	Photosynthesis|Endocrine resistance	NA	NA	NA
Gohir.A11G248900	-1.58924	0.0241703	-2.71031	0.000321003	-4.81839	8.68874e-07	IPR009806	Photosystem II PsbW, class 2	NA	NA	GO:0009507|GO:0009523|GO:0015979	Cellular Component|Cellular Component|Biological Process	chloroplast|photosystem II|photosynthesis
Gohir.A01G192400	-2.44103	0.000361827	-2.71543	3.23564e-05	-4.31357	1.28236e-07	IPR003251|IPR008434|IPR009078	Rubrerythrin|Magnesium-protoporphyrin IX monomethyl ester [oxidative] cyclase|Ferritin-like superfamily	ko00860	Porphyrin and chlorophyll metabolism	GO:0015979|GO:0015995|GO:0016491|GO:0046872|GO:0048529|GO:0055114	Biological Process|Biological Process|Molecular Function|Molecular Function|Molecular Function|Biological Process	photosynthesis|chlorophyll biosynthetic process|oxidoreductase activity|metal ion binding|magnesium-protoporphyrin IX monomethyl ester (oxidative) cyclase activity|oxidation-reduction process
Gohir.A13G191700	-1.74705	0.0044233	-2.72529	4.51321e-05	-5.4334	5.1148e-08	IPR009518	Photosystem II PsbX	NA	NA	GO:0009523|GO:0015979|GO:0016020	Cellular Component|Biological Process|Cellular Component	photosystem II|photosynthesis|membrane
Gohir.A05G186100	-1.65751	0.0036444	-2.85464	1.21655e-05	-4.12428	1.04194e-07	IPR001433|IPR001709|IPR015701|IPR017927|IPR017938|IPR035442|IPR039261	Oxidoreductase FAD/NAD(P)-binding|Flavoprotein pyridine nucleotide cytochrome reductase|Ferredoxin--NADP reductase|FAD-binding domain, ferredoxin reductase-type|Riboflavin synthase-like beta-barrel|Ferredoxin--NADP reductase, plant and Cyanobacteria type|Ferredoxin-NADP reductase (FNR), nucleotide-binding domain	ko00195|ko01522	Photosynthesis|Endocrine resistance	GO:0016491|GO:0055114	Molecular Function|Biological Process	oxidoreductase activity|oxidation-reduction process
Gohir.D13G197200	-1.72048	0.00883722	-2.85825	7.13074e-05	-4.54129	3.66773e-07	IPR009518	Photosystem II PsbX	NA	NA	GO:0009523|GO:0015979|GO:0016020	Cellular Component|Biological Process|Cellular Component	photosystem II|photosynthesis|membrane
Gohir.D13G197100	-1.95897	0.00292838	-2.88366	4.31319e-05	-4.56748	3.75155e-07	IPR009518	Photosystem II PsbX	NA	NA	GO:0009523|GO:0015979|GO:0016020	Cellular Component|Biological Process|Cellular Component	photosystem II|photosynthesis|membrane
Gohir.D02G213900	-2.45357	0.00117405	-2.9243	7.9546e-05	-4.66373	3.94426e-07	NA	NA	ko00195|ko01522	Photosynthesis|Endocrine resistance	NA	NA	NA
Gohir.A10G235100	-1.69091	0.015025	-2.95306	0.000114845	-4.49265	1.01095e-06	IPR001344|IPR022796|IPR023329	Chlorophyll A-B binding protein, plant|Chlorophyll A-B binding protein|Chlorophyll a/b binding domain superfamily	ko00196|ko01522	Photosynthesis - antenna proteins|Endocrine resistance	GO:0009765|GO:0016020	Biological Process|Cellular Component	photosynthesis, light harvesting|membrane
Gohir.A03G192900	-2.17544	0.00109041	-2.95907	2.08919e-05	-4.59137	1.01274e-07	IPR001041|IPR010241|IPR012675|IPR036010	2Fe-2S ferredoxin-type iron-sulfur binding domain|Ferredoxin [2Fe-2S], plant|Beta-grasp domain superfamily|2Fe-2S ferredoxin-like superfamily	ko00195|ko01522	Photosynthesis|Endocrine resistance	GO:0009055|GO:0022900|GO:0051536|GO:0051537	Molecular Function|Biological Process|Molecular Function|Molecular Function	electron transfer activity|electron transport chain|iron-sulfur cluster binding|2 iron, 2 sulfur cluster binding
Gohir.D06G169100	-2.81903	0.00422906	-4.5194	4.52943e-05	-7.44038	2.79368e-07	IPR001344|IPR022796|IPR023329	Chlorophyll A-B binding protein, plant|Chlorophyll A-B binding protein|Chlorophyll a/b binding domain superfamily	ko00196|ko01522	Photosynthesis - antenna proteins|Endocrine resistance	GO:0009765|GO:0016020	Biological Process|Cellular Component	photosynthesis, light harvesting|membrane
Gohir.A06G164200	-2.96357	0.00440643	-4.80891	4.65979e-05	-7.94358	3.66889e-07	IPR001344|IPR022796|IPR023329	Chlorophyll A-B binding protein, plant|Chlorophyll A-B binding protein|Chlorophyll a/b binding domain superfamily	ko00196|ko01522	Photosynthesis - antenna proteins|Endocrine resistance	GO:0009765|GO:0016020	Biological Process|Cellular Component	photosynthesis, light harvesting|membrane
Gohir.A12G229532	5.80658	0.00300372	-5.31562	0.00194678	5.92634	0.000632683	IPR002615|IPR036062	Photosystem I PsaJ, reaction centre subunit IX|Photosystem I PsaJ, reaction centre subunit IX superfamily	ko00195|ko01522	Photosynthesis|Endocrine resistance	GO:0009522|GO:0015979	Cellular Component|Biological Process	photosystem I|photosynthesis
